# Supplementary material
Source: PubMed Central journal article supplement (PMC4216480)
Supplement: Supp_Data.pdf [file Supp_Data.pdf]

## **Supplemental Information**

**Glutaminase 1 is essential for the differentiation, proliferation and survival of human neural progenitor cells**

**Running title: GLS1 is essential for NPC**

**Authors:** Yi Wang<sup>1,2</sup>, Yunlong Huang<sup>1,2\*</sup>, Lixia Zhao<sup>1,2</sup>, Yuju Li<sup>1,2</sup>, and Jialin Zheng<sup>1,2,3\*</sup>

**Addresses:** <sup>1</sup>Laboratory of Neuroimmunology and Regenerative Therapy, Departments of <sup>2</sup>Pharmacology and Experimental Neuroscience and <sup>3</sup>Pathology and Microbiology, University of Nebraska Medical Center, Omaha, NE 68198-5930

\*Address correspondence and reprint requests to Dr. Jialin Zheng or Dr. Yunlong Huang, Laboratory of Neuroimmunology and Regenerative Therapy, Departments of Pharmacology and Experimental Neuroscience and Pathology and Microbiology, 985930 Nebraska Medical Center, Omaha, NE 68198-5930. Phone: 402-559-5656; Fax: 402-559-7480; Email: [jzheng@unmc.edu](mailto:jzheng@unmc.edu) or [yhuan1@unmc.edu](mailto:yhuan1@unmc.edu).

## Supplementary Figures

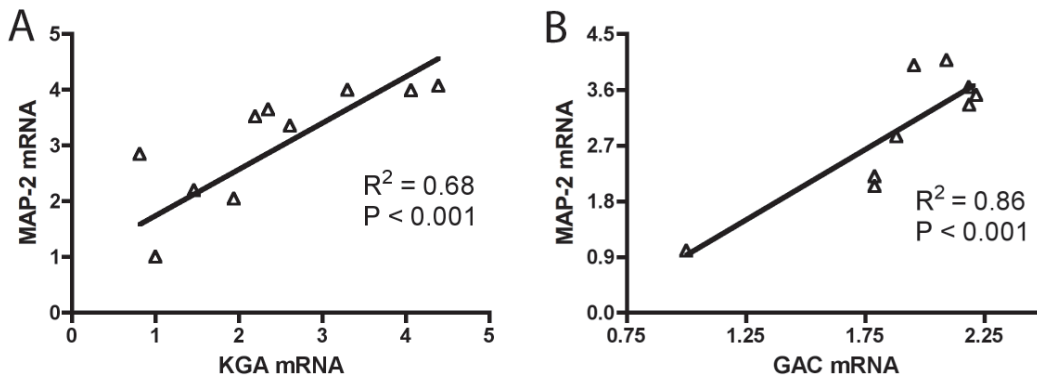

**Figure S1. KGA and GAC mRNA were correlated with MAP-2 mRNA. (A, B)** Correlation of the gene expression levels of KGA (A) and GAC (B) with MAP-2 was determined by Spearman correlation.

## Supplementary Tables

**Table S1. Total counted cell numbers of Figs. 3-5**

|        | Figure 3 |      |      | Figure 4 |      | Figure 5 |      |
|--------|----------|------|------|----------|------|----------|------|
|        | MAP-2    | GFAP | DAPI | Ki67     | DAPI | TUNEL    | DAPI |
| siCON  | 561      | 70   | 832  | 427      | 898  | 86       | 1237 |
| siGLS1 | 285      | 81   | 739  | 337      | 943  | 133      | 906  |
